# Supplementary material
Source: publisher figshare collection journal article supplement (https://sage.figshare.com/ndownloader/files/20105648)
Supplement: Supplementary file 1 [file 20105648]

Supplementary Table 1. Exploratory factor analysis and reliability estimates of the Baller Identity Measurement Scale.

| Item                                                                               | Factors     |                 |
|------------------------------------------------------------------------------------|-------------|-----------------|
|                                                                                    | Affectivity | Social Identity |
| 1. I consider myself a student-athlete.                                            |             | .741            |
| 2. I have many goals related to being a student-athlete.                           | .747        |                 |
| 3. Most of my friends are considered more students than athletes.                  |             | .503            |
| 4. Being a student-athlete is the most important part of my life.                  | .876        |                 |
| 5. I spend more time thinking about being a student-athlete than anything else     |             | .565            |
| 6. When I'm a student-athlete, I feel good about myself.                           | .880        |                 |
| 7. Other people see me mainly as a student-athlete.                                |             | .703            |
| 8. I feel bad about myself when I do poorly when I'm not a student-athlete.        | .855        |                 |
| 9. Being a student-athlete is the only important thing in my life                  |             | .512            |
| 10. I would be very depressed if I were injured and could not be a student-athlete | .863        |                 |
| <b>Alpha</b>                                                                       | <b>0.92</b> | <b>0.73</b>     |

Supplementary Table 2. Exploratory factor analysis and reliability estimates of the Student-Athletes' Motivation Toward Sports and Academics Questionnaire.

| Item                                                                                                         | Factors     |             |            |
|--------------------------------------------------------------------------------------------------------------|-------------|-------------|------------|
|                                                                                                              | AM          | SM          | CM         |
| 1. I am confident that I can achieve a high-grade point average this year (3.0 or above)                     | .827        |             |            |
| 2. Achieving a high level of performance in my sport is an important goal for me this year                   |             | .425        |            |
| 3. It is important for me to learn what is taught in my courses                                              | .911        |             |            |
| 4. I am willing to put in the time to earn excellent grades in my courses                                    | .945        |             |            |
| 5. Within an academic environment, I find it more challenging to face difficult tasks                        | .658        |             |            |
| 6. For me, studies are important to achieve knowledge and skills                                             | .895        |             |            |
| 7. I will be able to use what is taught in my courses in different aspects of my life outside of school      | .882        |             |            |
| 8. I chose to play my sport because it is something I am interested in as a career                           |             | .779        |            |
| 9. For me, it is important to train seriously to improve my performance                                      |             |             | -.413      |
| 10. I chose (or will choose) my major because it is something I am interested in as a career                 | .720        |             |            |
| 11. Earning a high-grade point average (27/30 or above) is not an important goal for me this year            | -.570       |             |            |
| 12. It is important to me to learn the skills and strategies taught by my coaches                            | .732        |             |            |
| 13. It is important for me to do better than other athletes in my sport                                      |             |             | -.425      |
| 14. The time I spend engaged in my sport is enjoyable for me                                                 | .417        |             |            |
| 15. It is worth the effort to be an exceptional athlete in my sport                                          | .451        |             |            |
| 16. The achievement of a degree is important to enrich my knowledge                                          | .835        |             |            |
| 17. In sport, I find stimulating those situations requiring high performances and being difficult to perform | .593        |             |            |
| 18. During the years, I compete in my sport, completing a college degree is not a goal for me                | -.622       |             |            |
| 19. I am confident that I can be a star performer on my team this year                                       |             | .610        |            |
| 20. My goal is to make it to the professional level or the Olympics in my sport                              |             | .877        |            |
| 21. Situations that allow me to test my capacities stimulate me                                              | .636        |             |            |
| 22. I am confident that I can make it to an elite level in my sport (Professional/Olympics)                  |             | .874        |            |
| 23. I am confident that I can earn a college degree                                                          | .860        |             |            |
| 24. I will be able to use the skills I learn in my sport in other areas of my life outside of sports         | .732        |             |            |
| 25. Achieving high performances in my sport is not an important goal for me this year                        |             |             |            |
| 26. For me, it is important to achieve high performances and not to make mistakes                            |             |             | -.417      |
| 27. I am willing to put in the time to be outstanding in my sport                                            |             | .532        | -.406      |
| 28. The content of most of my courses is interesting to me                                                   | .777        |             |            |
| 29. It is important for me to obtain a degree because it will help me to find a job                          | .814        |             |            |
| 30. It is not worth the effort to earn excellent grades in my courses                                        | -.745       |             |            |
| <b>Cronbach's alpha</b>                                                                                      | <b>0.92</b> | <b>0.88</b> | <b>.85</b> |

AM = Academic Motivation; SM = Sport Motivation; CM = Career Motivation
